# Supplementary material for: Lymnaea schirazensis, an Overlooked Snail Distorting Fascioliasis Data: Genotype, Phenotype, Ecology, Worldwide Spread, Susceptibility, Applicability
Source: PubMed Central journal article supplement (PMC3183092; doi:10.1371/journal.pone.0024567), 2011-09-29
Supplement: pone.0024567.s007.pdf [file pone.0024567.s007.pdf]

**Table S4.** Pairwise distances between mtDNA *cox1* nucleotide sequences according to PAUP, including the lymnaeid species studied, together with species of the *Galba/Fossaria* group and other proximal lymnaeid species available in GenBank.

|    | 1  | 2       | 3       | 4       | 5       | 6       | 7       | 8       | 9       | 10      | 11      | 12      | 13      | 14      | 15      | 16      | 17      | 18      | 19      | 20      | 21      |
|----|----|---------|---------|---------|---------|---------|---------|---------|---------|---------|---------|---------|---------|---------|---------|---------|---------|---------|---------|---------|---------|
| 1  | -  | 0.00149 | 0.05655 | 0.02083 | 0.02232 | 0.03443 | 0.11161 | 0.12000 | 0.11458 | 0.11458 | 0.11458 | 0.12054 | 0.10714 | 0.10714 | 0.10565 | 0.11458 | 0.11458 | 0.11310 | 0.10268 | 0.14583 | 0.15123 |
| 2  | 1  | -       | 0.05804 | 0.01935 | 0.02083 | 0.03286 | 0.11012 | 0.11833 | 0.11310 | 0.11310 | 0.11310 | 0.11905 | 0.10565 | 0.10565 | 0.10417 | 0.11310 | 0.11310 | 0.11161 | 0.10119 | 0.14435 | 0.14969 |
| 3  | 38 | 39      | -       | 0.04315 | 0.04464 | 0.05008 | 0.10119 | 0.10500 | 0.10417 | 0.10119 | 0.10119 | 0.10417 | 0.10714 | 0.11012 | 0.11161 | 0.10565 | 0.10565 | 0.10417 | 0.09375 | 0.14881 | 0.15278 |
| 4  | 14 | 13      | 29      | -       | 0.00149 | 0.02191 | 0.09970 | 0.10667 | 0.10863 | 0.10565 | 0.10565 | 0.10863 | 0.10119 | 0.09821 | 0.09970 | 0.10119 | 0.10119 | 0.09970 | 0.09226 | 0.14435 | 0.14969 |
| 5  | 15 | 14      | 30      | 1       | -       | 0.02347 | 0.10119 | 0.10833 | 0.11012 | 0.10714 | 0.10714 | 0.11012 | 0.10268 | 0.09970 | 0.10119 | 0.10268 | 0.10268 | 0.10119 | 0.09375 | 0.14583 | 0.15123 |
| 6  | 22 | 21      | 32      | 14      | 15      | -       | 0.10798 | 0.10829 | 0.11111 | 0.10798 | 0.10798 | 0.11111 | 0.10955 | 0.10955 | 0.11111 | 0.11111 | 0.11111 | 0.10955 | 0.10329 | 0.14867 | 0.14867 |
| 7  | 75 | 74      | 68      | 67      | 68      | 69      | -       | 0.00333 | 0.09673 | 0.09375 | 0.09226 | 0.09970 | 0.08929 | 0.08780 | 0.08929 | 0.09226 | 0.09226 | 0.09077 | 0.09375 | 0.14286 | 0.14815 |
| 8  | 72 | 71      | 63      | 64      | 65      | 64      | 2       | -       | 0.09833 | 0.09500 | 0.09500 | 0.10167 | 0.09667 | 0.09500 | 0.09667 | 0.09833 | 0.09667 | 0.09500 | 0.10000 | 0.15000 | 0.15000 |
| 9  | 77 | 76      | 70      | 73      | 74      | 71      | 65      | 59      | -       | 0.00595 | 0.00893 | 0.00744 | 0.08929 | 0.09375 | 0.09226 | 0.09226 | 0.09375 | 0.09226 | 0.08780 | 0.12500 | 0.12963 |
| 10 | 77 | 76      | 68      | 71      | 72      | 69      | 63      | 57      | 4       | -       | 0.00595 | 0.01042 | 0.09077 | 0.09226 | 0.09375 | 0.08929 | 0.09077 | 0.08929 | 0.08482 | 0.12500 | 0.12963 |
| 11 | 77 | 76      | 68      | 71      | 72      | 69      | 62      | 57      | 6       | 4       | -       | 0.01339 | 0.08929 | 0.09077 | 0.09226 | 0.08631 | 0.08780 | 0.08631 | 0.08185 | 0.11905 | 0.12346 |
| 12 | 81 | 80      | 70      | 73      | 74      | 71      | 67      | 61      | 5       | 7       | 9       | -       | 0.09524 | 0.09673 | 0.09821 | 0.09673 | 0.09821 | 0.09673 | 0.08631 | 0.12649 | 0.13117 |
| 13 | 72 | 71      | 72      | 68      | 69      | 70      | 60      | 58      | 60      | 61      | 60      | 64      | -       | 0.00744 | 0.00595 | 0.05804 | 0.05804 | 0.05655 | 0.05804 | 0.13542 | 0.14043 |
| 14 | 72 | 71      | 74      | 66      | 67      | 70      | 59      | 57      | 63      | 62      | 61      | 65      | 5       | -       | 0.00149 | 0.05655 | 0.05655 | 0.05506 | 0.05952 | 0.13542 | 0.14043 |
| 15 | 71 | 70      | 75      | 67      | 68      | 71      | 60      | 58      | 62      | 63      | 62      | 66      | 4       | 1       | -       | 0.05804 | 0.05804 | 0.05655 | 0.06101 | 0.13690 | 0.14198 |
| 16 | 77 | 76      | 71      | 68      | 69      | 71      | 62      | 59      | 62      | 60      | 58      | 65      | 39      | 38      | 39      | -       | 0.00298 | 0.00446 | 0.05506 | 0.13542 | 0.14043 |
| 17 | 77 | 76      | 71      | 68      | 69      | 71      | 62      | 58      | 63      | 61      | 59      | 66      | 39      | 38      | 39      | 2       | -       | 0.00149 | 0.05655 | 0.13690 | 0.14198 |
| 18 | 76 | 75      | 70      | 67      | 68      | 70      | 61      | 57      | 62      | 60      | 58      | 65      | 38      | 37      | 38      | 3       | 1       | -       | 0.05804 | 0.13542 | 0.14043 |
| 19 | 69 | 68      | 63      | 62      | 63      | 66      | 63      | 60      | 59      | 57      | 55      | 58      | 39      | 40      | 41      | 37      | 38      | 39      | -       | 0.13393 | 0.13889 |
| 20 | 98 | 97      | 100     | 97      | 98      | 95      | 96      | 90      | 84      | 84      | 80      | 85      | 91      | 91      | 92      | 91      | 92      | 91      | 90      | -       | 0.00000 |
| 21 | 98 | 97      | 99      | 97      | 98      | 95      | 96      | 90      | 84      | 84      | 80      | 85      | 91      | 91      | 92      | 91      | 92      | 91      | 90      | 0       | -       |

Only *cox1* sequence fragments of a length similar to that of sequences obtained in present paper are included. Below diagonal = total character differences; above diagonal = mean character differences (adjusted for missing data). Haplotype codes only provisional due to incomplete sequences of the gene. Sequence correspondences: 1 = *L. cubensis cox1-a* from Cuba [15]; 2 = *L. cubensis cox1-b* from USA [45]; 3 = *L. viatrix cox1-a* from Argentina [15]; 4 = *L. neotropica cox1-a* from Peru [15]; 5 = *L. neotropica cox1-b* from Argentina [58]; 6 = *F. bulimoides* from USA, without provisional code ascription due to undetermined nucleotides in the sequence [44]; 7 = *G. truncatula cox1-a* from Spain [15]; 8 = *G. truncatula* from Germany, without provisional code ascription due to undetermined nucleotides in the sequence [57]; 9 = *L. schirazensis cox1-a* from Iran, Egypt, Spain, Dominican Republic, Mexico, Venezuela, Ecuador and Peru (present paper); 10 = *L. schirazensis cox1-b* from Mexico (present paper); 11 = *L. schirazensis cox1-c* from Ecuador (present paper); 12 = *L. schirazensis cox1-d* from Peru (present paper); 13 = *L. humilis cox1-a* from USA [45]; 14 = *L. humilis cox1-b* from USA [45]; 15 = *L. humilis cox1-c* from USA [45]; 16 = *L. cousini cox1-a* from Ecuador [55]; 17 = *L. cousini cox1-b* from Colombia [55]; 18 = *L. cousini cox1-c* from Colombia [55]; 19 = *L. meridensis cox1-a* from Venezuela [55]; 20 = *P. columella cox1-a* from Puerto Rico [55]; 21 = *P. columella* from Australia, without provisional code ascription due to the shorter sequence fragment [44].
